# Supplementary material for: Impact of Skin Tissue Collection Method on Downstream MALDI-Imaging
Source: Metabolites. 2022 May 30;12(6):497. doi: 10.3390/metabo12060497 (PMC9227925; doi:10.3390/metabo12060497)
Supplement: Supplementary file 1 [file metabolites-12-00497-s001.zip › metabolites-1672290-supplementary.pdf]

## **Impact of skin tissue collection method on downstream MALDI imaging**

Manoj Yadav<sup>1,\*¥</sup>, Prem Prashant Chaudhary<sup>1,\*</sup>, Brandon D'Souza<sup>1</sup>, Jacquelyn Spathies<sup>1</sup>, and Ian A Myles<sup>1</sup>

1 – Epithelial Therapeutics Unit, National Institute of Allergy and Infectious Disease, National Institutes of Health, Bethesda, MD, USA

\* Author contributed equally

¥Corresponding author: manoj.yadav@nih.gov

**Supplementary Table S1**

| <b>FFPE vs Fresh Frozen +ve ion mode</b>                   |
|------------------------------------------------------------|
| Purine metabolism                                          |
| Pyrimidine metabolism                                      |
| N-Glycan biosynthesis                                      |
| Glycosphingolipid biosynthesis - globo and isoglobo series |
| Glycosphingolipid biosynthesis - lacto and neolacto series |
| Fructose and mannose metabolism                            |
| Fatty acid biosynthesis                                    |
| Fatty acid elongation                                      |
| Amino sugar and nucleotide sugar metabolism                |
| Metabolism of xenobiotics by cytochrome P450               |
| Drug metabolism - other enzymes                            |

**Supplementary Table S2**

| <b>Fresh Frozen vs FFPE +ve ion mode</b>                   |
|------------------------------------------------------------|
| Glycosaminoglycan degradation                              |
| Glycosphingolipid biosynthesis - lacto and neolacto series |
| N-Glycan biosynthesis                                      |
| Steroid biosynthesis                                       |
| Primary bile acid biosynthesis                             |
| Mucin type O-glycan biosynthesis                           |
| Mannose type O-glycan biosynthesis                         |
| Glycosphingolipid biosynthesis - globo and isoglobo series |
| Biosynthesis of unsaturated fatty acids                    |

**Supplementary Table S3**

| <b>Common metabolites +ve ion mode</b>                 |
|--------------------------------------------------------|
| Steroid hormone biosynthesis                           |
| Purine metabolism                                      |
| Pyrimidine metabolism                                  |
| Amino sugar and nucleotide sugar metabolism            |
| Glycosylphosphatidylinositol (GPI)-anchor biosynthesis |
| Glycerophospholipid metabolism                         |
| One carbon pool by folate                              |
| Riboflavin metabolism                                  |
| Nicotinate and nicotinamide metabolism                 |

|                                      |
|--------------------------------------|
| Porphyrin and chlorophyll metabolism |
|--------------------------------------|

**Supplementary Table S4**

| <b>FFPE vs Fresh Frozen -ve ion mode</b>                   |
|------------------------------------------------------------|
| Glycosphingolipid biosynthesis - lacto and neolacto series |
| N-Glycan biosynthesis                                      |
| Primary bile acid biosynthesis                             |
| Various types of N-glycan biosynthesis                     |
| Inositol phosphate metabolism                              |
| Glycosphingolipid biosynthesis - globo and isoglobo series |
| Folate biosynthesis                                        |
| Porphyrin and chlorophyll metabolism                       |
| Biosynthesis of unsaturated fatty acids                    |
| Phosphatidylinositol signaling system                      |

**Supplementary Table S5**

| <b>Fresh Frozen vs FFPE -ve ion mode</b>     |
|----------------------------------------------|
| Purine metabolism                            |
| Folate biosynthesis                          |
| Riboflavin metabolism                        |
| Pyrimidine metabolism                        |
| Mannose type O-glycan biosynthesis           |
| Drug metabolism - other enzymes              |
| Citrate cycle (TCA cycle)                    |
| Pentose phosphate pathway                    |
| Pentose and glucuronate interconversions     |
| Fructose and mannose metabolism              |
| Alanine, aspartate and glutamate metabolism  |
| Phosphonate and phosphinate metabolism       |
| Amino sugar and nucleotide sugar metabolism  |
| Glycerophospholipid metabolism               |
| Pyruvate metabolism                          |
| One carbon pool by folate                    |
| Pantothenate and CoA biosynthesis            |
| Porphyrin and chlorophyll metabolism         |
| Terpenoid backbone biosynthesis              |
| Metabolism of xenobiotics by cytochrome P450 |
| Drug metabolism - cytochrome P450            |

**Supplementary Table S6**

| <b>Common metabolites -ve ion mode</b>       |
|----------------------------------------------|
| Fatty acid degradation                       |
| Butanoate metabolism                         |
| Terpenoid backbone biosynthesis              |
| Citrate cycle (TCA cycle)                    |
| Pantothenate and CoA biosynthesis            |
| Pyrimidine metabolism                        |
| Amino sugar and nucleotide sugar metabolism  |
| Metabolism of xenobiotics by cytochrome P450 |
| Glycerophospholipid metabolism               |
| Propanoate metabolism                        |
| Valine, leucine and isoleucine degradation   |
| Drug metabolism - other enzymes              |
| Purine metabolism                            |
| Pentose and glucuronate interconversions     |
| Galactose metabolism                         |
| Ascorbate and aldarate metabolism            |
| Synthesis and degradation of ketone bodies   |
| Alanine, aspartate and glutamate metabolism  |
| Cysteine and methionine metabolism           |
| Valine, leucine and isoleucine biosynthesis  |
| Lysine degradation                           |
| Tryptophan metabolism                        |
| Phosphonate and phosphinate metabolism       |
| Starch and sucrose metabolism                |
| Glycerolipid metabolism                      |
| Pyruvate metabolism                          |
| Glyoxylate and dicarboxylate metabolism      |
| Drug metabolism - cytochrome P450            |
